# Supplementary material for: Generation and NMR studies of stable cations derived from monothia[3.2]- and dithia[3.3]metacyclophanes
Source: Royal Society of Chemistry journal article supplement (doi:10.1039/b100265l), 2001-01-01

5mmsw,H lineshape  
spin,7-8-98

exp9 s2pul

| SAMPLE               |                | DEC. & VT  |         |
|----------------------|----------------|------------|---------|
| date                 | Jul 6 2000     | dfrq       | 499.908 |
| solvent              | CD2CL2         | dn         | H1      |
| file                 | /export/home/~ | dpwr       | 30      |
| laali/okazaki107/to~ |                | dof        | -284.2  |
| 00070605-H50-CD2Cl~  |                | dm         | n       |
|                      | 2-5.fid        | dmm        | c       |
|                      |                | dmf        | 200     |
| ACQUISITION          |                |            |         |
| sfrq                 | 499.910        | dseq       |         |
| tn                   |                | dres       | 1.0     |
| at                   | 1.383          | homo       | n       |
| np                   | 35968          | temp       | -50.0   |
| sw                   | 12999.7        | DEC2       |         |
| fb                   | 7000           | dfrq2      | 0       |
| bs                   | 4              | dn2        |         |
| tpwr                 | 55             | dpwr2      | 1       |
| pw                   | 12.0           | dof2       | 0       |
| d1                   | 1.000          | dm2        | n       |
| tof                  | 1918.9         | dmm2       | c       |
| nt                   | 16             | dmf2       | 200     |
| ct                   | 16             | dseq2      |         |
| alock                | n              | dres2      | 1.0     |
| gain                 | not used       | homo2      | n       |
| FLAGS                |                | PROCESSING |         |
| il                   | n              | wtfile     |         |
| in                   | n              | proc       | ft      |
| dp                   | y              | fn         | 65536   |
| hs                   | nn             | math       | f       |
| DISPLAY              |                |            |         |
| sp                   | -250.2         | werr       |         |
| wp                   | 5998.6         | wexp       |         |
| vs                   | 97             | wbs        |         |
| sc                   | 0              | wnt        | wft     |
| wc                   | 250            |            |         |
| hzmm                 | 24.00          |            |         |
| is                   | 777.90         |            |         |
| rfl                  | 4754.9         |            |         |
| rfp                  | 2659.5         |            |         |
| th                   | 2              |            |         |
| ins                  | 6.000          |            |         |
| nm                   | cdc ph         |            |         |

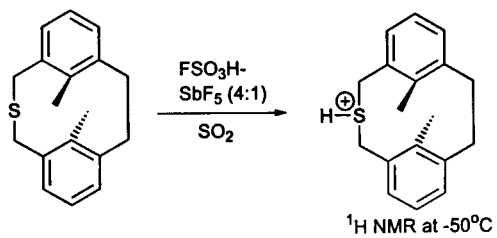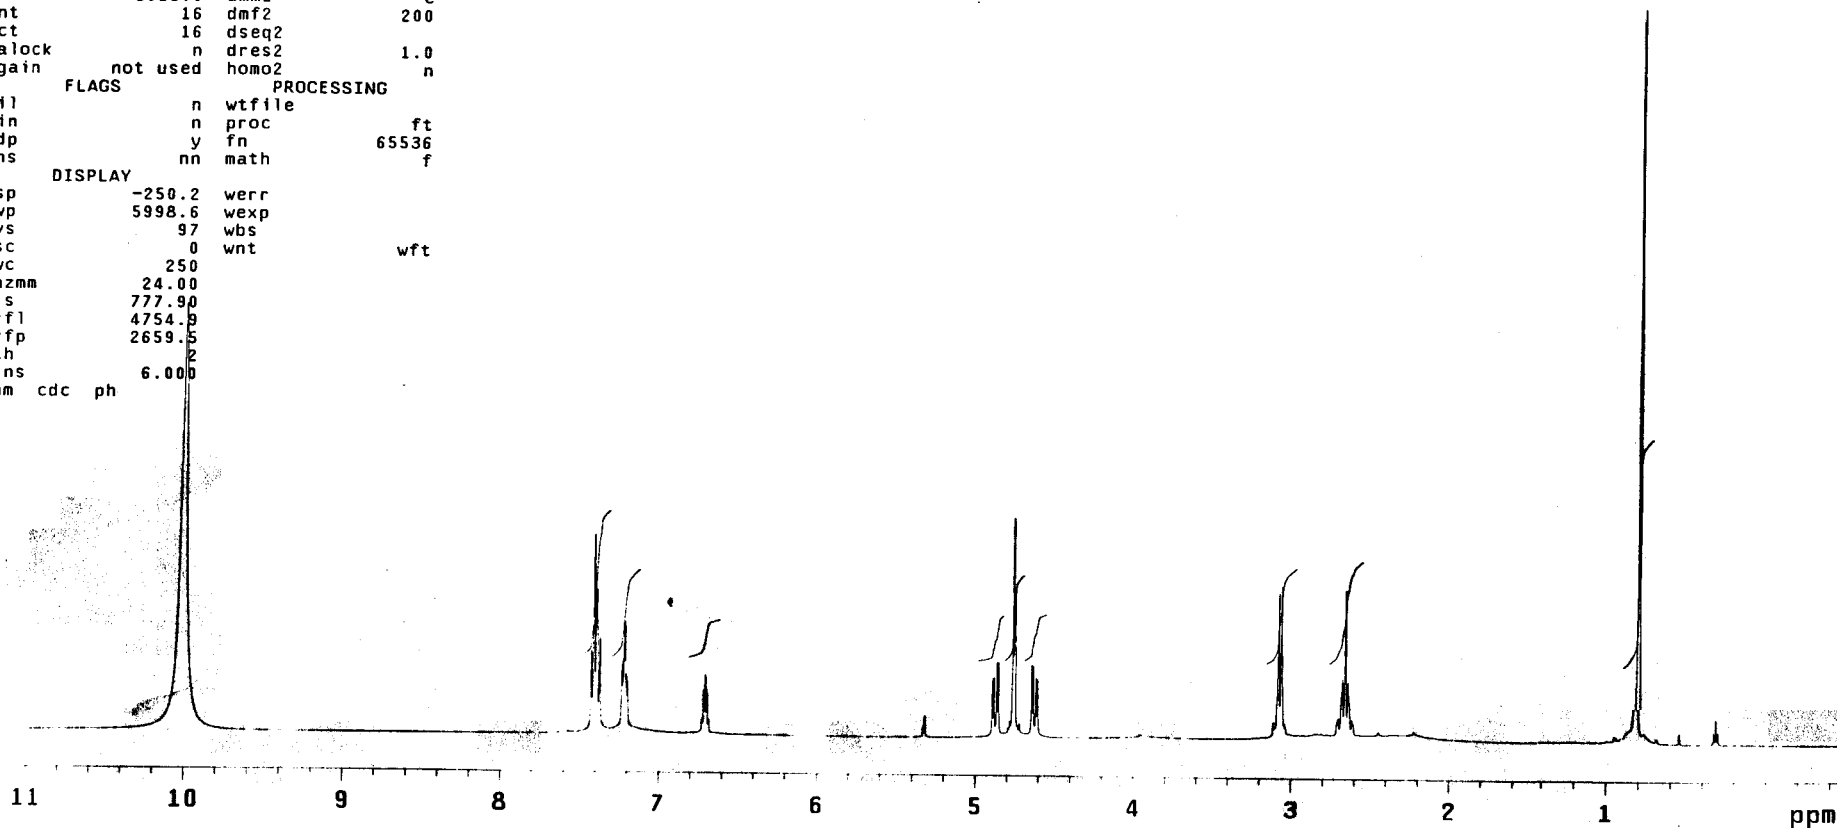

okazaki/cation

Pulse Sequence: relayh

Solvent: CD2CL2

Temp. -50.0 C / 223.2 K

File: to00070605-COSY50-CD2C12-5

INOVA-500 "ksu500"

PULSE SEQUENCE: relayh

Relax. delay 0.500 sec

COSY 90-90

Acq. time 0.677 sec

Width 3782.9 Hz

2D Width 3782.9 Hz

4 repetitions

128 increments

OBSERVE H1, 499.9058795 MHz

DATA PROCESSING

Sine bell 0.270 sec

F1 DATA PROCESSING

Sine bell 0.017 sec

FT size 4096 x 512

Total time 10 min, 18 sec

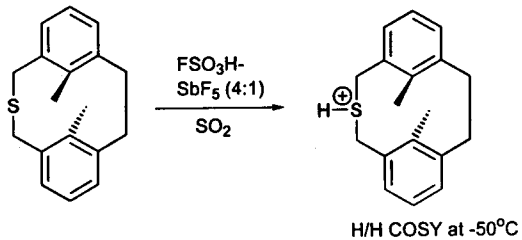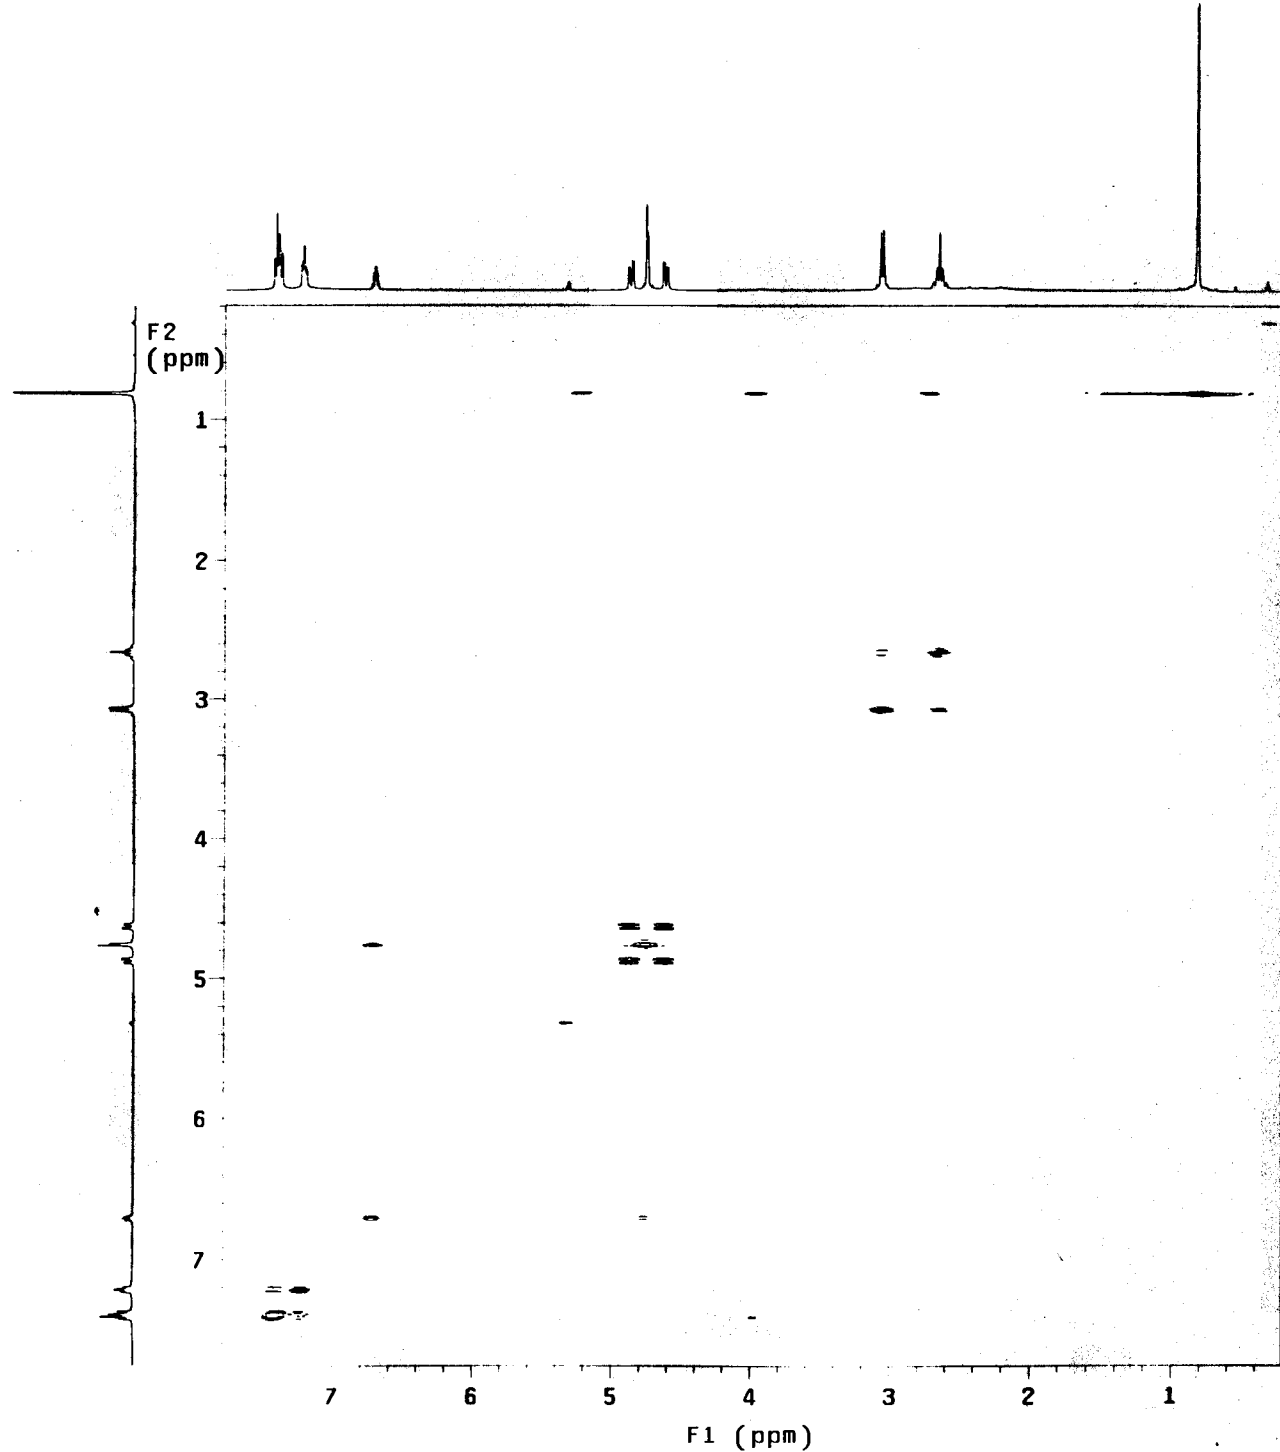

## STANDARD CARBON PARAMETERS

exp8 s2pu1

|                     |                |            |         |
|---------------------|----------------|------------|---------|
| SAMPLE              |                | DEC. & VT  |         |
| date                | Jul 6 2000     | dfrq       | 499.908 |
| solvent             | CD2CL2         | dn         | H1      |
| file                | /export/home/~ | dpwr       | 35      |
| laali/okazak107/to~ |                | dof        | 0       |
| 00070605-C50-CD2C1~ |                | dm         | nny     |
|                     | 2-5.fid        | dmm        | w       |
| ACQUISITION         |                | dmf        | 10800   |
| sfrq                | 125.716        | dseq       |         |
| tn                  | C13            | dres       | 1.0     |
| at                  | 0.640          | homo       | n       |
| np                  | 64000          | temp       | -50.0   |
| sw                  | 50000.0        | DEC2       |         |
| fb                  | not used       | dfrq2      | 0       |
| bs                  | 4              | dn2        |         |
| tpwr                | 52             | dpwr2      | 1       |
| pw                  | 16.0           | dof2       | 0       |
| d1                  | 0.500          | dm2        | n       |
| d2                  | 0.500          | dmm2       | c       |
| tof                 | 2423.4         | dmf2       | 10000   |
| nt                  | 10000          | dseq2      |         |
| ct                  | 284            | dres2      | 1.0     |
| alock               | n              | homo2      | n       |
| gain                | 26             | PROCESSING |         |
| FLAGS               |                | lb         | 2.00    |
| il                  | n              | wtfile     |         |
| in                  | n              | proc       | ft      |
| dp                  | y              | fn         | 131072  |
| hs                  | nn             | math       | f       |
| DISPLAY             |                |            |         |
| sp                  | -629.0         | werr       |         |
| wp                  | 25140.0        | wexp       |         |
| vs                  | 53             | wbs        |         |
| sc                  | 0              | wnt        |         |
| wc                  | 250            |            |         |
| hzmm                | 100.56         |            |         |
| is                  | 4250.00        |            |         |
| rfl                 | 17416.8        |            |         |
| rfp                 | 6787.9         |            |         |
| th                  | 6              |            |         |
| ins                 | 1.000          |            |         |
| nm                  | cdc ph         |            |         |

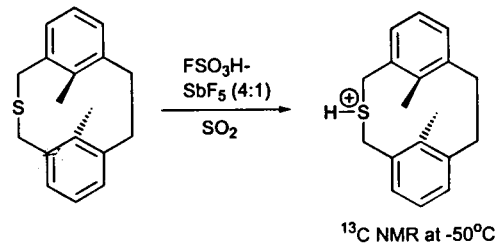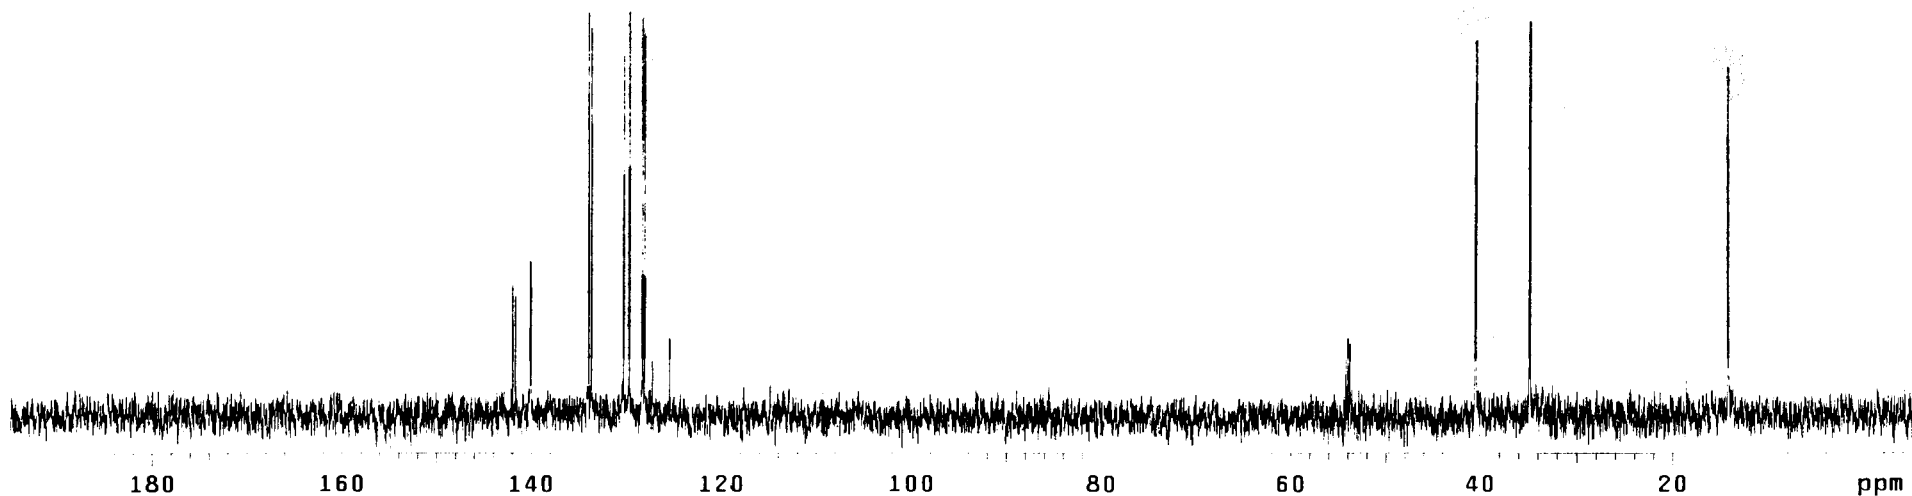

5mmsw,H lineshape  
spin,7-8-98

exp9 s2pul

| SAMPLE              |                | DEC. & VT  |         |
|---------------------|----------------|------------|---------|
| date                | Jun 29 2000    | dfrq       | 499.908 |
| solvent             | CD2Cl2         | dn         | H1      |
| file                | /export/home/~ | dpwr       | 30      |
| laali/okazaki06/to~ |                | dof        | -284.2  |
| 00062902-H70-CD2Cl~ |                | dm         | n       |
|                     | 2-5.fid        | dmm        | c       |
| ACQUISITION         |                |            |         |
| sfrq                | 499.910        | dseq       |         |
| tn                  | H1             | dres       | 1.0     |
| at                  | 1.383          | homo       | n       |
| np                  | 35968          | temp       | -70.0   |
| sw                  | 12999.7        | DEC2       |         |
| fb                  | 7000           | dfrq2      | 0       |
| bs                  | 4              | dn2        |         |
| tpwr                | 55             | dpwr2      | 1       |
| pw                  | 12.0           | dof2       | 0       |
| d1                  | 1.000          | dm2        | n       |
| tof                 | 1918.9         | dmm2       | c       |
| nt                  | 16             | dmf2       | 200     |
| ct                  | 16             | dseq2      |         |
| alock               | n              | dres2      | 1.0     |
| gain                | not used       | homo2      | n       |
| FLAGS               |                | PROCESSING |         |
| il                  | n              | wtfile     |         |
| in                  | n              | proc       | ft      |
| dp                  | y              | fn         | 65536   |
| hs                  | nn             | math       | f       |
| DISPLAY             |                |            |         |
| sp                  | -250.2         | werr       |         |
| wp                  | 5998.6         | wexp       |         |
| vs                  | 138            | wbs        |         |
| sc                  | 0              | wnt        | wft     |
| wc                  | 250            |            |         |
| hzmm                | 24.00          |            |         |
| is                  | 446.43         |            |         |
| rfl                 | 4755.7         |            |         |
| rfp                 | 2659.5         |            |         |
| th                  | 2              |            |         |
| ins                 | 6.000          |            |         |
| nm                  | cdc ph         |            |         |

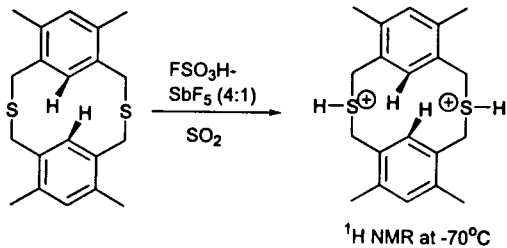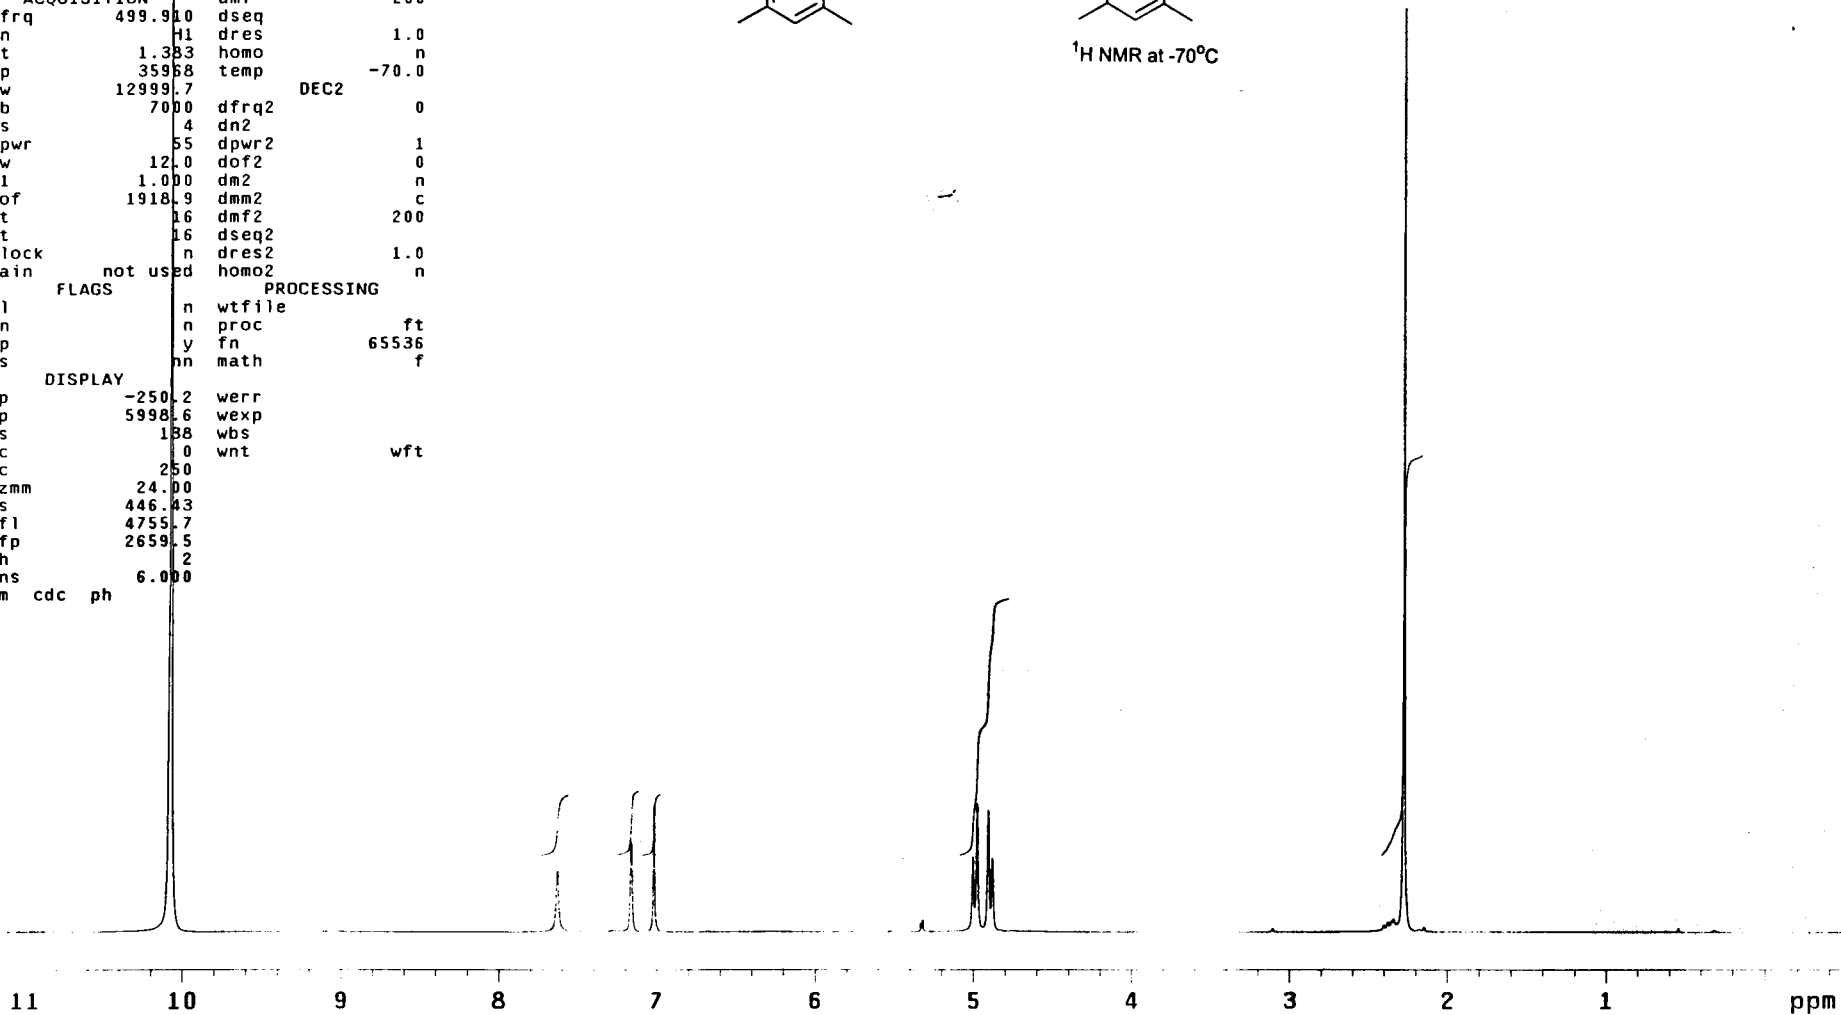

## STANDARD CARBON PARAMETERS

exp8 s2pu1

|                     |                |            |         |
|---------------------|----------------|------------|---------|
| SAMPLE              |                | DEC. & VT  |         |
| date                | Jun 29 2000    | dfrq       | 499.908 |
| solvent             | CD2CL2         | dn         | H1      |
| file                | /export/home/~ | dpwr       | 35      |
| laali/okazaki06/to~ |                | dof        | 0       |
| 00062902-C70-CD2C1~ |                | dm         | nny     |
|                     | 2-5.fid        | dmm        | w       |
| ACQUISITION         |                | dmf        | 10800   |
| sfrq                | 125.716        | dseq       |         |
| tn                  | C13            | dres       | 1.0     |
| at                  | 0.640          | homo       | n       |
| np                  | 64000          | temp       | -70.0   |
| sw                  | 50000.0        | DEC2       |         |
| fb                  | not used       | dfrq2      | 0       |
| bs                  | 4              | dn2        |         |
| tpwr                | 52             | dpwr2      | 1       |
| pw                  | 16.0           | dof2       | 0       |
| d1                  | 0.500          | dm2        | n       |
| d2                  | 0.500          | dmm2       | c       |
| tof                 | 2423.4         | dmf2       | 10000   |
| nt                  | 10000          | dseq2      |         |
| ct                  | 164            | dres2      | 1.0     |
| alock               | n              | homo2      | n       |
| gain                | 26             | PROCESSING |         |
| FLAGS               |                | lb         | 2.00    |
| il                  | n              | wtfile     |         |
| in                  | n              | proc       | ft      |
| dp                  | y              | fn         | 131072  |
| hs                  | nn             | math       | f       |
| DISPLAY             |                |            |         |
| sp                  | -628.9         | werr       |         |
| wp                  | 25140.0        | wexp       |         |
| vs                  | 110            | wbs        |         |
| sc                  | 0              | wnt        |         |
| wc                  | 250            |            |         |
| hzmm                | 100.56         |            |         |
| is                  | 4250.00        |            |         |
| rfl                 | 17438.9        |            |         |
| rfp                 | 6787.9         |            |         |
| th                  | 6              |            |         |
| ins                 | 1.000          |            |         |
| nm                  | cdc ph         |            |         |

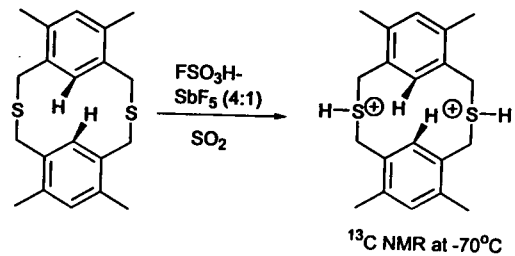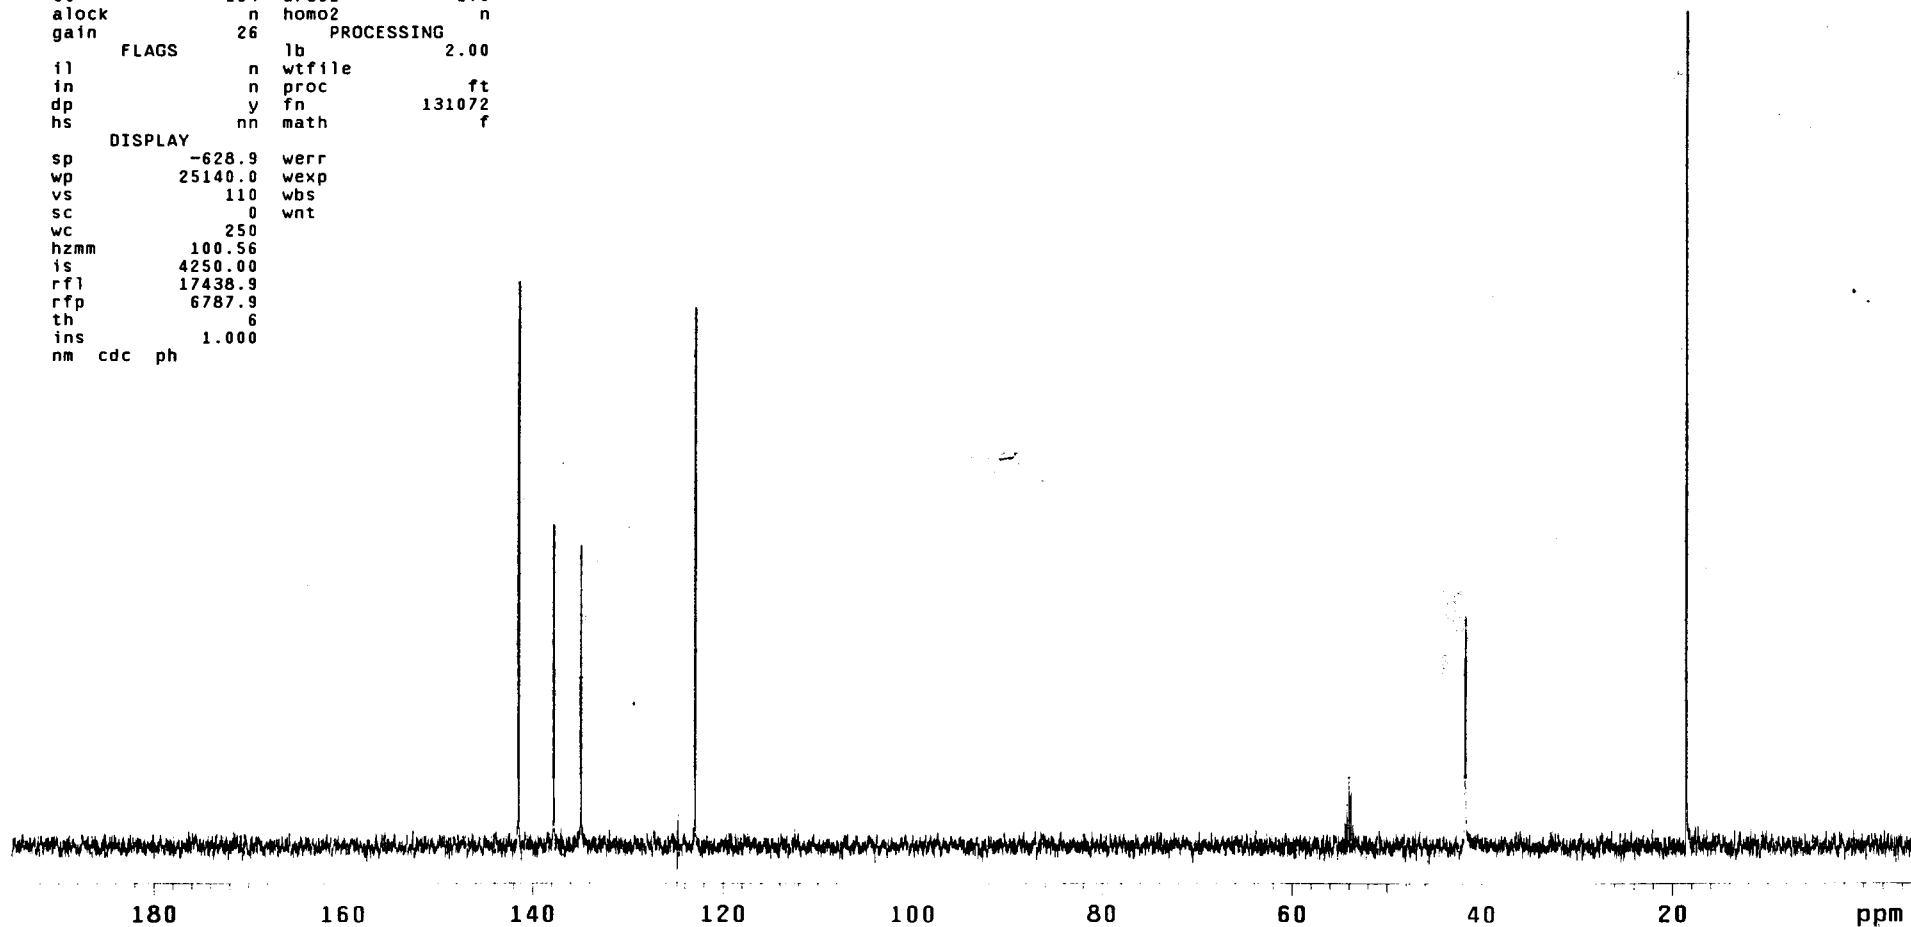

5mmsw,H lineshape  
spin,7-8-98

exp9 s2pu1

| SAMPLE              |                | DEC. & VT  |         |
|---------------------|----------------|------------|---------|
| date                | Jun 28 2000    | dfrq       | 499.908 |
| solvent             | CD2CL2         | dn         | H1      |
| file                | /export/home/~ | dpwr       | 30      |
| laa11/okazaki06/to  |                | dof        | -284.2  |
| 00062803-H70-CD2C1~ |                | dm         | n       |
|                     | 2-5.fid        | dmm        | c       |
| ACQUISITION         |                | dmf        | 200     |
| sfrq                | 499.910        | dseq       |         |
| tn                  | H1             | dres       | 1.0     |
| at                  | 1.383          | homo       | n       |
| np                  | 35968          | temp       | -70.0   |
| sw                  | 12999.7        | DEC2       |         |
| fb                  | 7000           | dfrq2      | 0       |
| bs                  | 4              | dn2        |         |
| tpwr                | 55             | dpwr2      | 1       |
| pw                  | 12.0           | dof2       | 0       |
| d1                  | 1.000          | dm2        | n       |
| tof                 | 1918.9         | dmm2       | c       |
| nt                  | 16             | dmf2       | 200     |
| ct                  | 16             | dseq2      |         |
| alock               | n              | dres2      | 1.0     |
| gain                | not used       | homo2      | n       |
| FLAGS               |                | PROCESSING |         |
| il                  | n              | wfile      |         |
| in                  | n              | proc       | ft      |
| dp                  | y              | fn         | 65536   |
| hs                  | nn             | math       | f       |
| DISPLAY             |                |            |         |
| sp                  | -250.2         | werr       |         |
| wp                  | 5998.6         | wexp       |         |
| vs                  | 81             | wbs        |         |
| sc                  | 0              | wnt        | wft     |
| wc                  | 250            |            |         |
| hzmm                | 24.00          |            |         |
| is                  | 477.49         |            |         |
| rfl                 | 4759.7         |            |         |
| rpf                 | 2659.5         |            |         |
| th                  | 2              |            |         |
| ins                 | 6.000          |            |         |
| nm                  | cdc ph         |            |         |

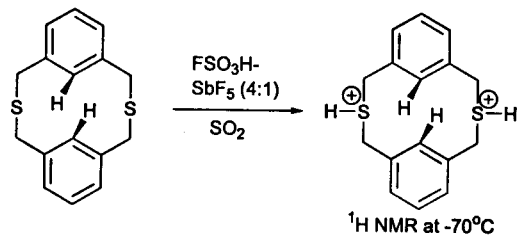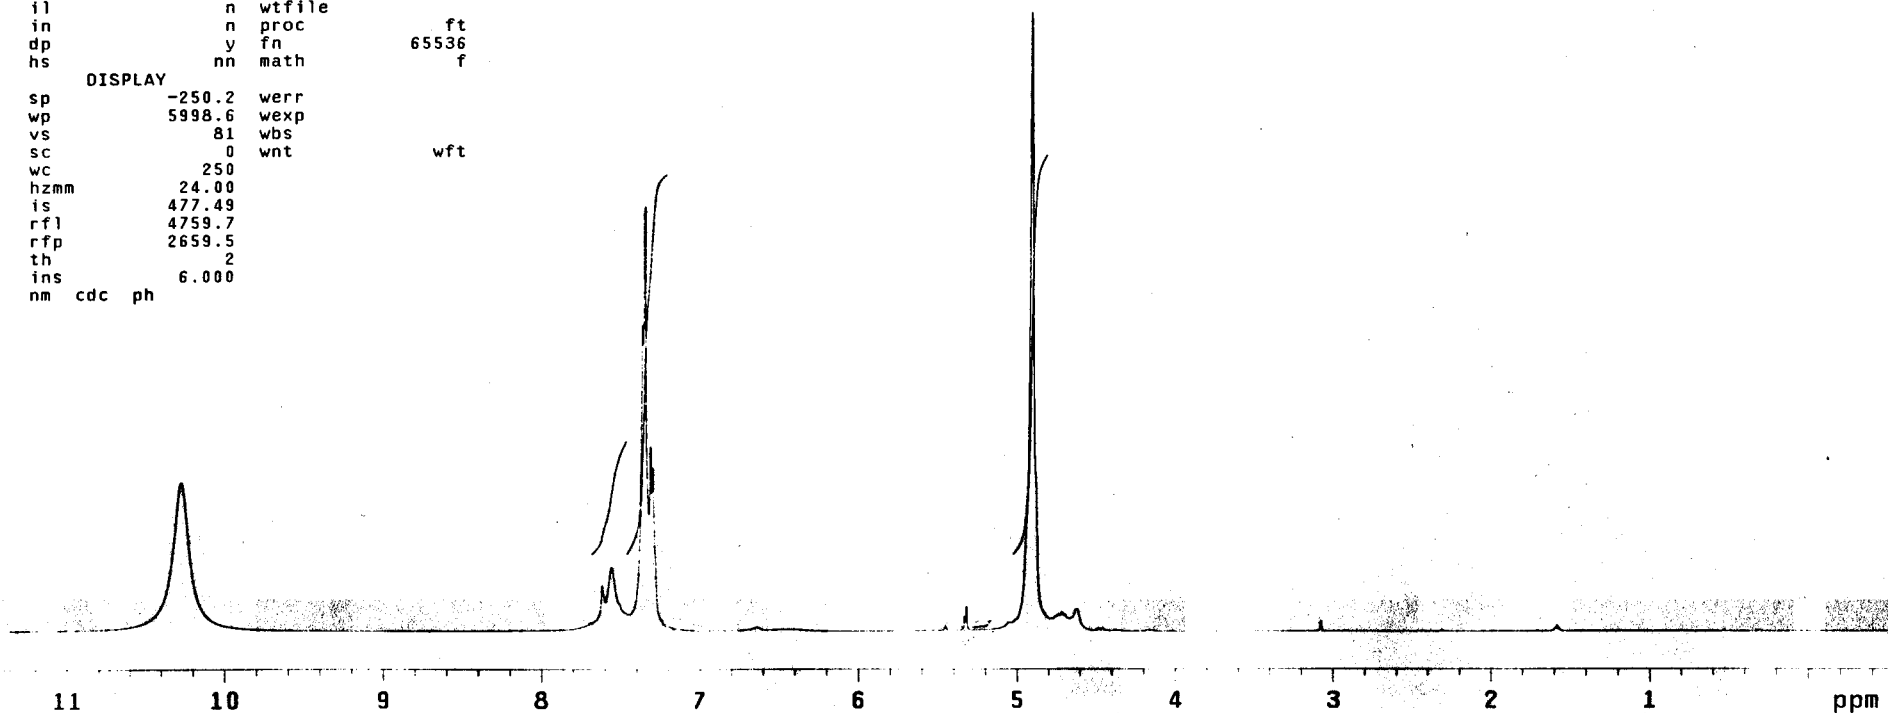

## STANDARD CARBON PARAMETERS

exp8 s2pul

| SAMPLE              |                | DEC. & VT  |         |      |
|---------------------|----------------|------------|---------|------|
| date                | Jun 28 2000    | dfrq       | 499.908 |      |
| solvent             | CD2CL2         | dn         | H1      |      |
| file                | /export/home/~ | dpwr       | 35      |      |
| laali/okazaki06/to~ |                | doF        | 0       |      |
| 00062803-C70-CD2C1~ |                | dm         | nny     |      |
|                     | 2-5.fid        | dmm        | w       |      |
| ACQUISITION         |                |            |         |      |
| sfrq                | 125.716        | dseq       | 10800   |      |
| tn                  | C13            | dres       | 1.0     |      |
| at                  | 0.640          | homo       | n       |      |
| np                  | 64000          | temp       | -70.0   |      |
| sw                  | 50000.0        | DEC2       |         |      |
| fb                  | not used       | dfrq2      | 0       |      |
| bs                  | 4              | dn2        |         |      |
| tpwr                | 52             | dpwr2      | 1       |      |
| pw                  | 16.0           | doF2       | 0       |      |
| d1                  | 0.500          | dm2        | n       |      |
| d2                  | 0.500          | dmm2       | c       |      |
| tof                 | 2423.4         | dmf2       | 10000   |      |
| nt                  | 10000          | dseq2      |         |      |
| ct                  | 136            | dres2      | 1.0     |      |
| alock               | n              | homo2      | n       |      |
| gain                | 26             | PROCESSING |         |      |
|                     | FLAGS          |            | lb      | 2.00 |
| il                  | n              | wtfile     |         |      |
| in                  | n              | proc       | ft      |      |
| dp                  | y              | fn         | 131072  |      |
| hs                  | nn             | math       | f       |      |
| DISPLAY             |                |            |         |      |
| sp                  | -628.6         | werr       |         |      |
| wp                  | 27653.9        | wexp       |         |      |
| vs                  | 61             | wbs        |         |      |
| sc                  | 0              | wnt        |         |      |
| wc                  | 250            |            |         |      |
| hzmm                | 110.62         |            |         |      |
| is                  | 4250.00        |            |         |      |
| rfl                 | 17427.9        |            |         |      |
| rfp                 | 6787.9         |            |         |      |
| th                  | 6              |            |         |      |
| ins                 | 1.000          |            |         |      |
| nm                  | cdc ph         |            |         |      |

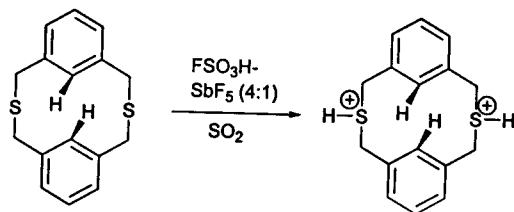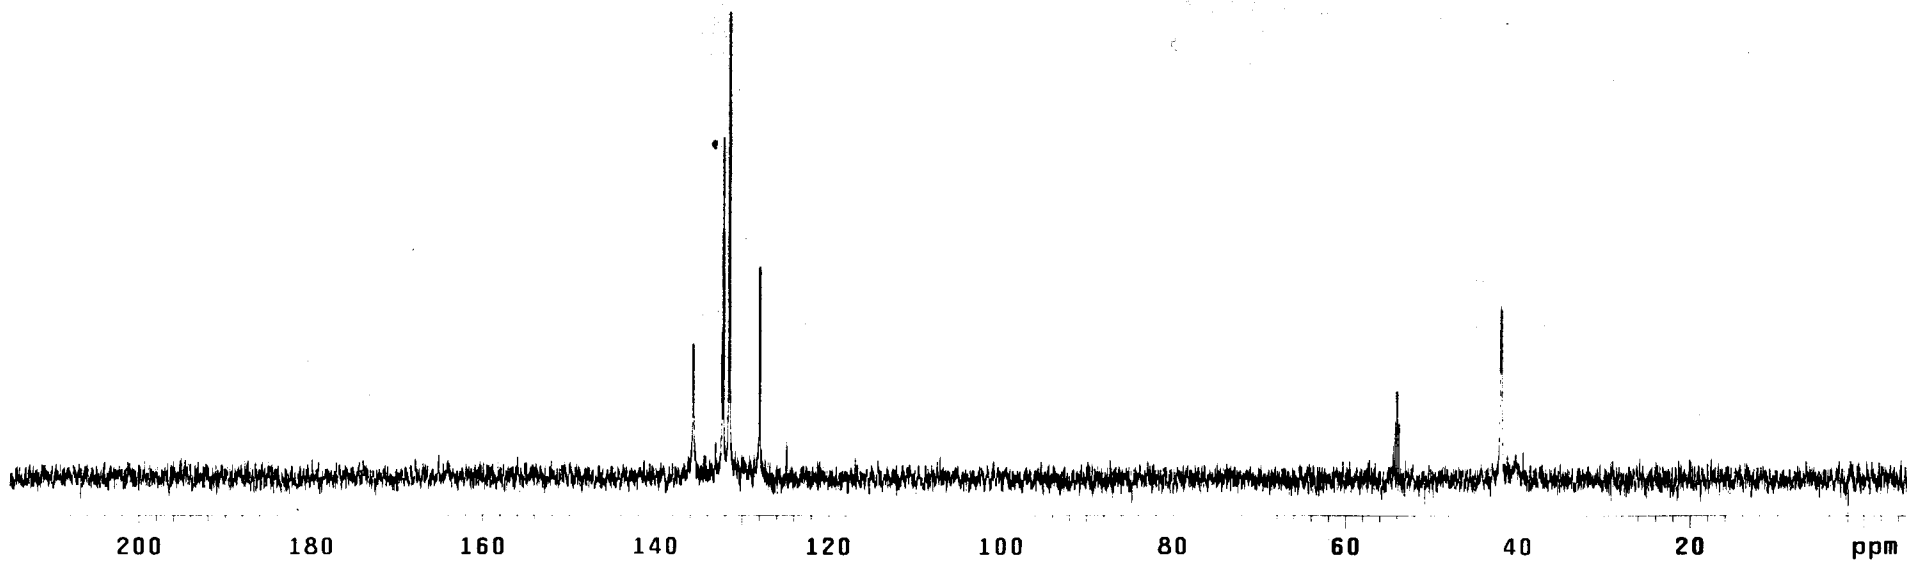

5mmw,H lineshape  
spin,7-8-98

exp9 s2pul

| SAMPLE              |                | DEC. & VT  |         |
|---------------------|----------------|------------|---------|
| date                | Jul 12 2000    | dfrq       | 499.908 |
| solvent             | CD2CL2         | dn         | H1      |
| file                | /export/home/~ | dpwr       | 30      |
| laali/okazaki07/to~ |                | dof        | -284.2  |
| 00071209-H50-CD2C1~ |                | dm         | n       |
| 2-5.fid             |                | dmm        | c       |
| ACQUISITION         |                |            |         |
| sfrq                | 499.910        | dseq       | 200     |
| tn                  | H1             | dres       | 1.0     |
| at                  | 1.383          | homo       | n       |
| np                  | 35968          | temp       | -50.0   |
| sw                  | 12999.7        | DEC2       |         |
| fb                  | 7000           | dfrq2      | 0       |
| bs                  | 4              | dn2        |         |
| tpwr                | 55             | dpwr2      | 1       |
| pw                  | 12.0           | dof2       | 0       |
| d1                  | 1.000          | dm2        | n       |
| tof                 | 1918.9         | dmm2       | c       |
| nt                  | 16             | dmf2       | 200     |
| ct                  | 16             | dseq2      |         |
| alock               | n              | dres2      | 1.0     |
| gain                | not used       | homo2      | n       |
| FLAGS               |                | PROCESSING |         |
| il                  | n              | wfile      |         |
| in                  | n              | proc       | ft      |
| dp                  | y              | fn         | 65536   |
| hs                  | nn             | math       | f       |
| DISPLAY             |                |            |         |
| sp                  | -250.1         | werr       |         |
| wp                  | 5998.6         | wexp       |         |
| vs                  | 82             | wbs        |         |
| sc                  | 0              | wnt        | wft     |
| wc                  | 250            |            |         |
| hzmm                | 24.00          |            |         |
| is                  | 446.43         |            |         |
| rfl                 | 4756.4         |            |         |
| rfp                 | 2659.5         |            |         |
| th                  | 2              |            |         |
| ins                 | 6.000          |            |         |
| nm                  | cdc ph         |            |         |

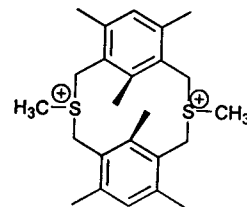

<sup>1</sup>H NMR at -50°C  
in FSO<sub>3</sub>H-SbF<sub>5</sub> (4:1)/SO<sub>2</sub>

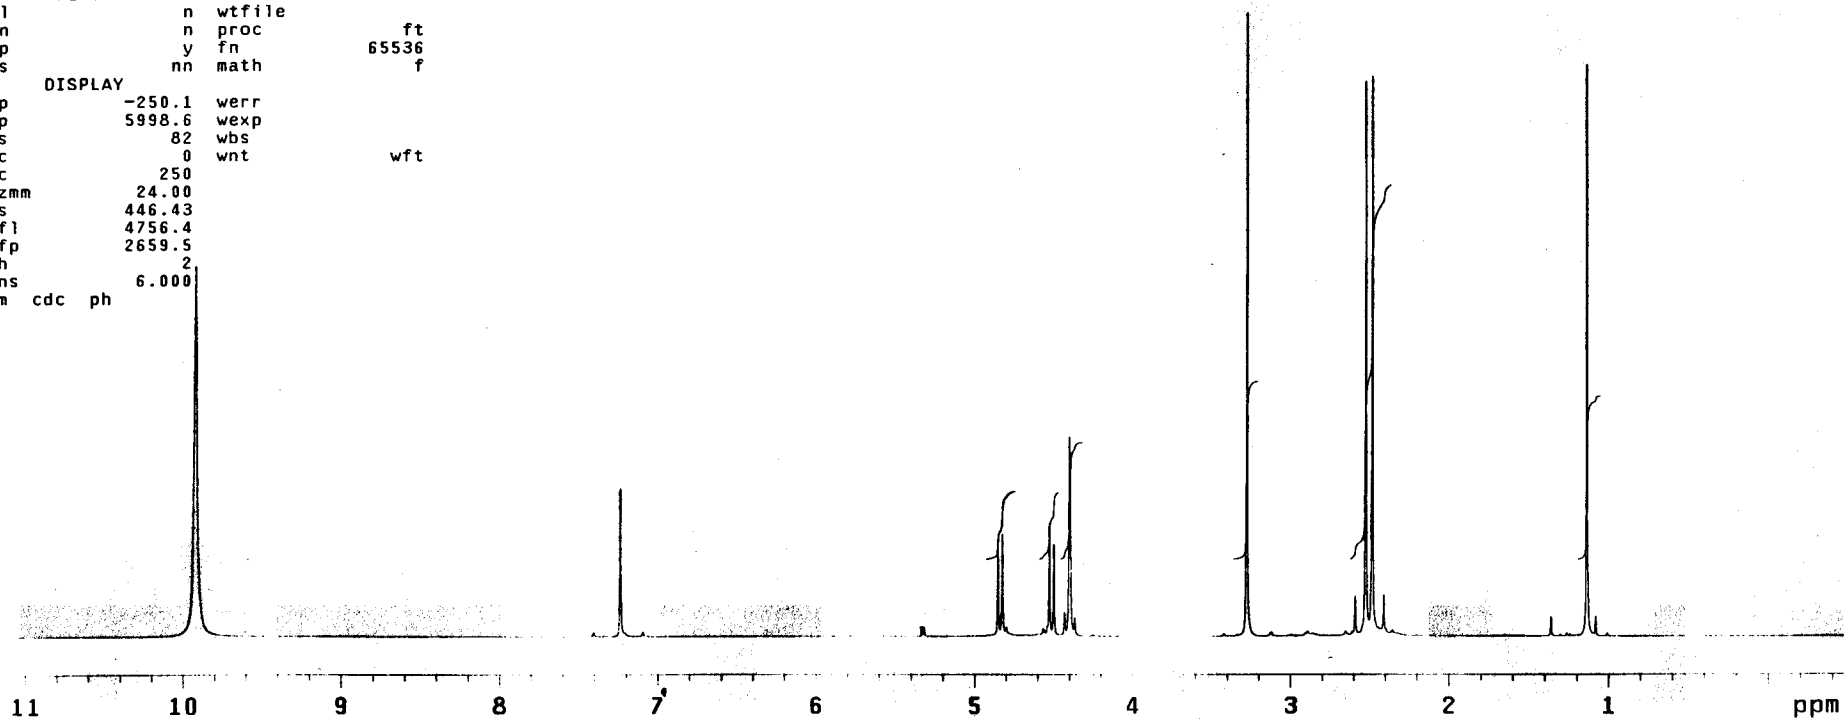



## STANDARD CARBON PARAMETERS

exp8 s2pu1

|                     |                |            |         |
|---------------------|----------------|------------|---------|
| SAMPLE              |                | DEC. & VT  |         |
| date                | Jul 12 2000    | dfrq       | 499.908 |
| solvent             | CD2CL2         | dn         | H1      |
| file                | /export/home/~ | dpwr       | 35      |
| laali/okazaki07/to~ |                | dof        | 0       |
| 00071209-C50-CD2C1~ |                | dm         | nyy     |
|                     | 2-5.fid        | dmm        | w       |
| ACQUISITION         |                | dmf        | 10800   |
| sfrq                | 125.716        | dseq       |         |
| tn                  | C13            | dres       | 1.0     |
| at                  | 0.640          | homo       | n       |
| np                  | 64000          | temp       | -50.0   |
| sw                  | 50000.0        | DEC2       |         |
| fb                  | not used       | dfrq2      | 0       |
| bs                  | 4              | dn2        |         |
| tpwr                | 52             | dpwr2      | 1       |
| pw                  | 16.0           | dof2       | 0       |
| d1                  | 0.500          | dm2        | n       |
| d2                  | 0.500          | dmm2       | c       |
| tof                 | 2423.4         | dmf2       | 10000   |
| nt                  | 10000          | dseq2      |         |
| ct                  | 116            | dres2      | 1.0     |
| alock               | n              | homo2      | n       |
| gain                | 60             | PROCESSING |         |
| FLAGS               |                | lb         | 2.00    |
| il                  | n              | wtfile     |         |
| in                  | n              | proc       | ft      |
| dp                  | y              | fn         | 131072  |
| hs                  | nn             | math       | f       |
| DISPLAY             |                | werr       |         |
| sp                  | -628.8         | wexp       |         |
| wp                  | 25140.0        | wbs        |         |
| vs                  | 46             | wnt        |         |
| sc                  | 0              |            |         |
| wc                  | 250            |            |         |
| hzmm                | 100.56         |            |         |
| is                  | 4250.00        |            |         |
| rfl                 | 17415.2        |            |         |
| rfp                 | 6787.9         |            |         |
| th                  | 6              |            |         |
| ins                 | 1.000          |            |         |
| nm                  | cdc ph         |            |         |

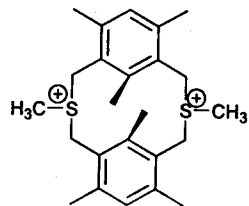

$^{13}\text{C}$  NMR at  $-50^\circ\text{C}$   
in  $\text{FSO}_3\text{H-SbF}_5$  (4:1)/ $\text{SO}_2$

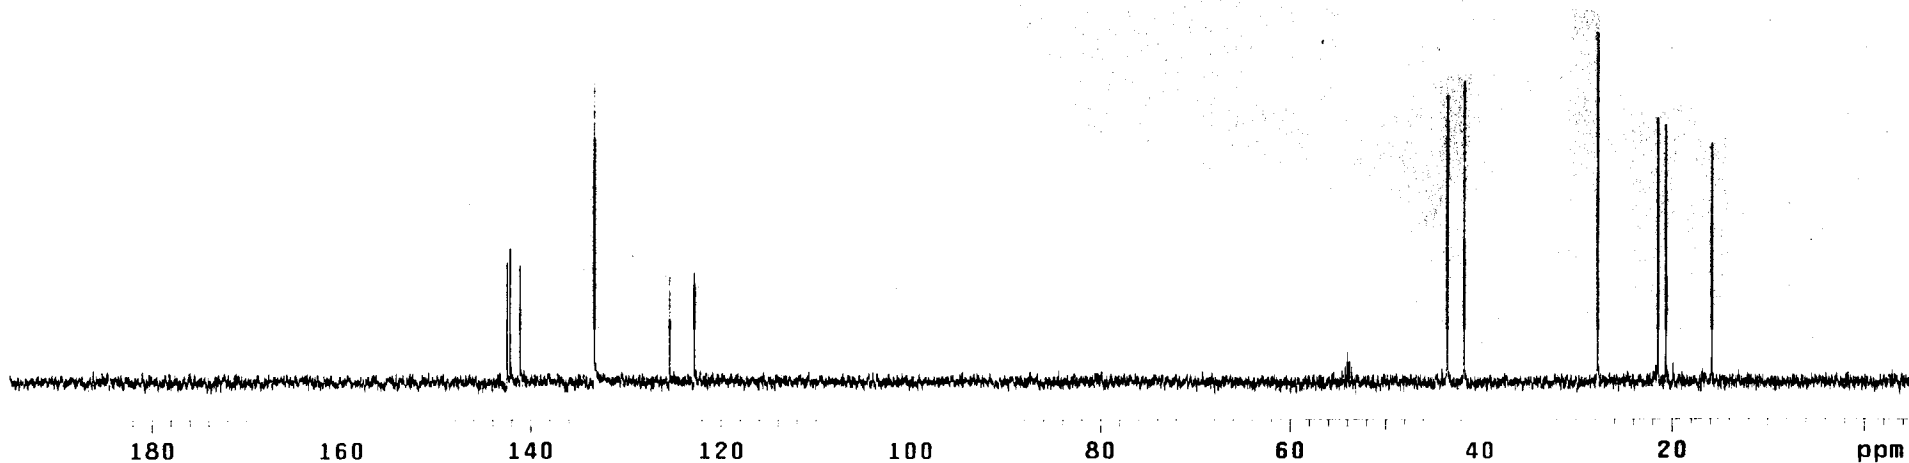

Supplement: b100265l.pdf [file b100265l.pdf]
